# Supplementary material for: The G protein database, GproteinDb
Source: PubMed Central journal article supplement (PMC8728128; doi:10.1093/nar/gkab852), 2021-09-27
Supplement: gkab852_supplemental_file.pdf [file gkab852_supplemental_file.pdf]

1 **SUPPLEMENTARY DATA**

2

**A**

**Structures**

| G PROTEIN                |    |         |        |          |    |         |        |         |        | STRUCTURE |                   |            |         | RECEPTOR |                 |               |               | OTHER PROTEINS  |             |             |   |
|--------------------------|----|---------|--------|----------|----|---------|--------|---------|--------|-----------|-------------------|------------|---------|----------|-----------------|---------------|---------------|-----------------|-------------|-------------|---|
| Fam.                     | α  | Species | Note   | % of Seq | β  | Species | γ      | Species | Method | PDB       | Refined structure | Resolution | UniProt | IUPHAR   | Receptor family | Class         | Species       | Receptor fusion | Antibodies  | Other       |   |
| <input type="checkbox"/> | Gs | αs      | Human  | -        | 55 | β1      | Bovine | γ2      | Bovine | cryo-EM   | 7DHI              | -          | 3.3     | ADRB2    | β2              | Adrenoceptors | A (Rhodopsin) | Human           | -           | Narobody-35 | - |
| <input type="checkbox"/> | Gs | αs      | Human  | -        | 49 | β1      | Bovine | γ2      | Bovine | cryo-EM   | 7DHR              | -          | 3.8     | ADRB2    | β2              | Adrenoceptors | A (Rhodopsin) | Human           | -           | Narobody-35 | - |
| <input type="checkbox"/> | Gs | αs      | Human  | -        | 50 | β1      | Bovine | γ2      | Bovine | cryo-EM   | 7BZ2              | -          | 3.8     | ADRB2    | β2              | Adrenoceptors | A (Rhodopsin) | Human           | -           | Narobody-35 | - |
| <input type="checkbox"/> | Gs | αs      | Human  | -        | 59 | β1      | Human  | γ2      | Human  | cryo-EM   | 6NS               | -          | 3.8     | ADRB2    | β2              | Adrenoceptors | A (Rhodopsin) | Human           | -           | Narobody-35 | - |
| <input type="checkbox"/> | Gs | αs      | Bovine | -        | 89 | β1      | Rat    | γ2      | Bovine | X-ray     | 3SN6              | -          | 3.2     | ADRB2    | β2              | Adrenoceptors | A (Rhodopsin) | Human           | T4-Lysozyme | Antibody    | - |

Showing 1 to 5 of 5 entries (filtered from 216 total entries)

**B**

**Structure models**

| MODEL                    |                          | RECEPTOR                      |            |             |       |         |               |               | G PROTEIN  |                                   |           | TEMPLATE    |                 |                                   |      |
|--------------------------|--------------------------|-------------------------------|------------|-------------|-------|---------|---------------|---------------|------------|-----------------------------------|-----------|-------------|-----------------|-----------------------------------|------|
| Date                     | Refined                  | UniProt                       | IUPHAR     | Rec. family | Class | Species | G protein     | G protein     | Transducer | Receptor                          | G protein | PDB         |                 |                                   |      |
| <input type="checkbox"/> | <input type="checkbox"/> | β2-adrenoceptor - gna2_human  | 2020-06-21 | No          | ADRB2 | β2      | Adrenoceptors | A (Rhodopsin) | Human      | G(i) subunit alpha-2              | GNAI2     | secondary   | A1 receptor     | G(i) subunit alpha-2              | 6DBH |
| <input type="checkbox"/> | <input type="checkbox"/> | β2-adrenoceptor - gna11_human | 2020-06-21 | No          | ADRB2 | β2      | Adrenoceptors | A (Rhodopsin) | Human      | G(i) subunit alpha-1              | GNAI1     | secondary   | μ receptor      | G(i) subunit alpha-1              | 6DDF |
| <input type="checkbox"/> | <input type="checkbox"/> | β2-adrenoceptor - gna15_human | 2020-06-21 | No          | ADRB2 | β2      | Adrenoceptors | A (Rhodopsin) | Human      | subunit alpha-15                  | GNA15     | no evidence | M1 receptor     | subunit alpha-11                  | 6CU  |
| <input type="checkbox"/> | <input type="checkbox"/> | β2-adrenoceptor - gna2_human  | 2021-03-15 | Yes         | ADRB2 | β2      | Adrenoceptors | A (Rhodopsin) | Human      | G(i) subunit alpha isoforms short | GNAS2     | primary     | β2-adrenoceptor | G(i) subunit alpha isoforms short | 6N3  |
| <input type="checkbox"/> | <input type="checkbox"/> | β2-adrenoceptor - gna3_human  | 2020-06-21 | No          | ADRB2 | β2      | Adrenoceptors | A (Rhodopsin) | Human      | G(i) subunit alpha-3              | GNA3      | secondary   | 5-HT1B receptor | G(i) subunit alpha                | 6G79 |
| <input type="checkbox"/> | <input type="checkbox"/> | β2-adrenoceptor - gna2_human  | 2021-03-15 | Yes         | ADRB2 | β2      | Adrenoceptors | A (Rhodopsin) | Human      | G(i) subunit alpha isoforms short | GNAS2     | primary     | β2-adrenoceptor | G(i) subunit alpha isoforms short | 7DHR |
| <input type="checkbox"/> | <input type="checkbox"/> | β2-adrenoceptor - gnao_human  | 2020-06-21 | No          | ADRB2 | β2      | Adrenoceptors | A (Rhodopsin) | Human      | G(i) subunit alpha                | GNAO      | secondary   | 5-HT1B receptor | G(i) subunit alpha                | 6G79 |
| <input type="checkbox"/> | <input type="checkbox"/> | β2-adrenoceptor - gna2_human  | 2020-06-21 | No          | ADRB2 | β2      | Adrenoceptors | A (Rhodopsin) | Human      | G(i) subunit alpha                | GNAZ      | secondary   | 5-HT1B receptor | G(i) subunit alpha                | 6G79 |
| <input type="checkbox"/> | <input type="checkbox"/> | β2-adrenoceptor - gnaq_human  | 2020-06-21 | No          | ADRB2 | β2      | Adrenoceptors | A (Rhodopsin) | Human      | G(i) subunit alpha                | GNAQ      | no evidence | M1 receptor     | subunit alpha-11                  | 6CU  |
| <input type="checkbox"/> | <input type="checkbox"/> | β2-adrenoceptor - gna2_bovin  | 2021-03-15 | Yes         | ADRB2 | β2      | Adrenoceptors | A (Rhodopsin) | Human      | G(i) subunit alpha isoforms short | GNAS2     | primary     | β2-adrenoceptor | G(i) subunit alpha isoforms short | 3SN6 |
| <input type="checkbox"/> | <input type="checkbox"/> | β2-adrenoceptor - gna11_human | 2020-06-21 | No          | ADRB2 | β2      | Adrenoceptors | A (Rhodopsin) | Human      | subunit alpha-11                  | GNA11     | no evidence | M1 receptor     | subunit alpha-11                  | 6CU  |

Showing 1 to 11 of 11 entries (filtered from 2,197 total entries)

3

4 **Supplementary Figure 1. Structures and structure models. (A) Structure and (B) structure model browsers applying a**  
 5 **filter to the receptor UniProt name to show β<sub>2</sub>-G protein complexes.**

6

7

1  
2

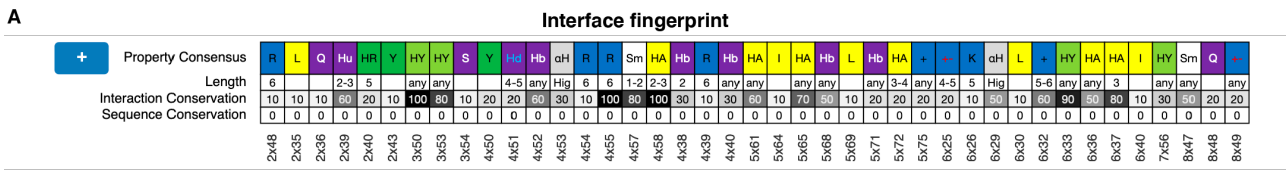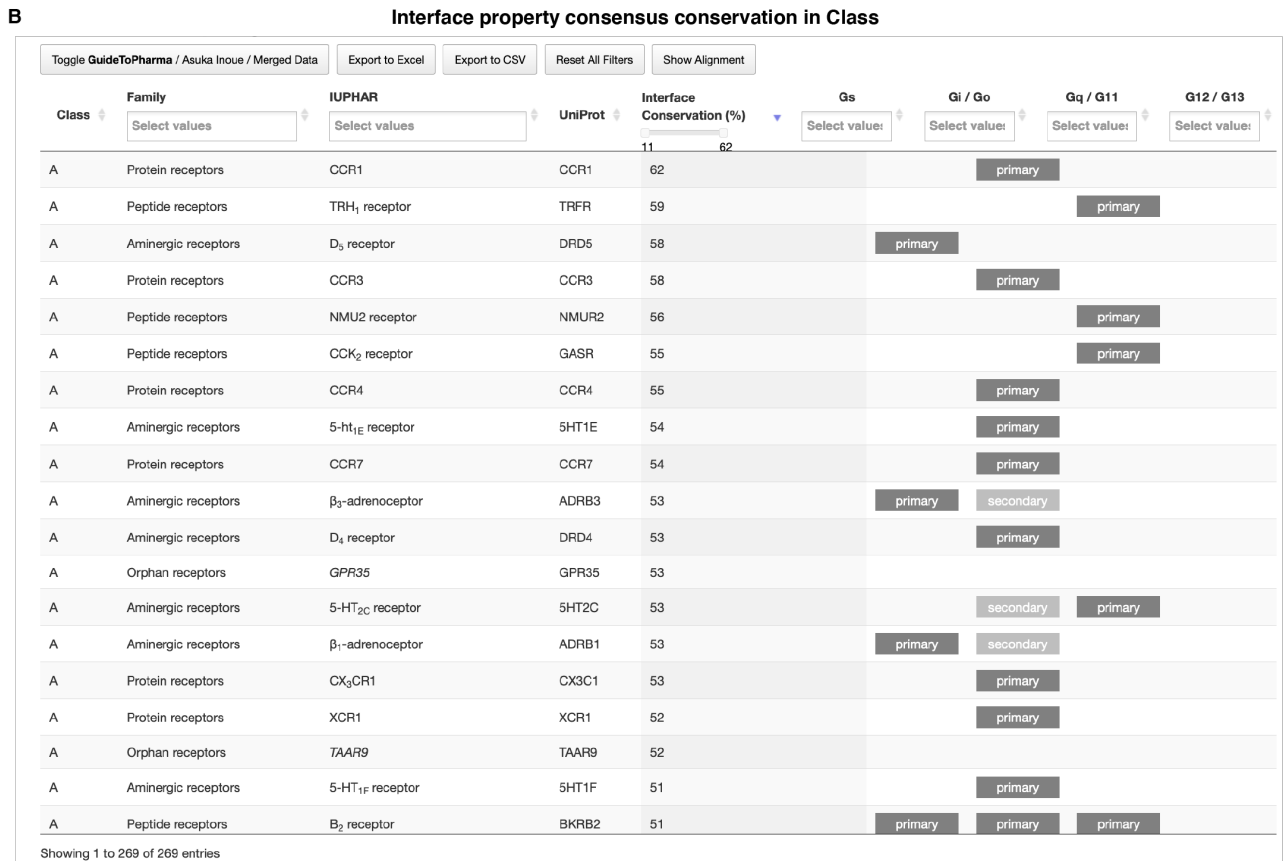

3  
4 **Supplementary Figure 2.** Interface interactions. **(A)** Interface fingerprint based on residue property consensus of  
5 representative class A GPCR-G<sub>i/o</sub> structures (PDB identifiers: 6OIK, 6D9H, 6K41, 6N4B, 6KPF, 6WWZ, 6LFO, 6OMM,  
6 6OS9 and 6DDE; same as in Fig. 2c). **(B)** Matching of the interface fingerprint listing all other class A GPCRs by  
7 decreasing conservation of residue properties along with known G protein couplings.

8  
9

### Mutations to increase G<sub>s</sub> binding

1. Mutations to increase G<sub>s</sub> binding    2. Mutations to decrease G<sub>s</sub> binding    3. All residue positions

#### Mutation design:

To **strengthen coupling**, mutate receptor positions lacking a conserved positive (+) property by introducing the highest conserved amino acid (AA) of the G<sub>s</sub> binding GPCRs having that property. For negative (-) properties, which contribute to non-binding, instead mutate receptor positions into the highest conserved AA of the G<sub>s</sub> binding GPCRs lacking that property.

| Segment | Residue               |                        |              | Mutant AA | Structure interactions (# receptors) | Mutation data ≥5-fold effect |           | G <sub>s</sub> binders vs non-binders sequence signature |       |       | Property conservation G <sub>s</sub> binders |                 |        | Property conservation G <sub>s</sub> non-binders |           |          | AA conservation G <sub>s</sub> binders |           | AA conservation G <sub>s</sub> non-binders |        | AA conservation GPCR class |    |           |    |
|---------|-----------------------|------------------------|--------------|-----------|--------------------------------------|------------------------------|-----------|----------------------------------------------------------|-------|-------|----------------------------------------------|-----------------|--------|--------------------------------------------------|-----------|----------|----------------------------------------|-----------|--------------------------------------------|--------|----------------------------|----|-----------|----|
|         | Target residue number | Generic residue number | Target WT AA |           |                                      | Increase coupling            | G protein | Ligand                                                   | #Mut. | #Rec. | Score (%)                                    | Property        | Length | Matching AAs                                     | Cons. (%) | Property | Length                                 | Cons. (%) | Property                                   | Length | Cons. (%)                  | AA | Cons. (%) | AA |
| TM1     | 43                    | 1x42                   | I            | L         | 0                                    | 4                            | 1         | 1                                                        | 31    | αH    | Hig                                          | A, K, L, M, R   | 98     | HY                                               | any       | 90       | HY                                     | any       | 38                                         | L      | 35                         | V  | 31        | I  |
| TM3     | 112                   | 3x31                   | I            | F         | 0                                    | 1                            | 4         | 2                                                        | -30   | HA    | 2-3                                          | I, L, V         | 98     | HY                                               | any       | 88       | HY                                     | any       | 29                                         | L      | 42                         | L  | 37        | L  |
| TM7     | 312                   | 7x38                   | N            | L         | 0                                    | 44                           | 150       | 19                                                       | 27    | HA    | 3-4                                          | I, L, M         | 82     | HY                                               | any       | 58       | HY                                     | any       | 33                                         | L      | 17                         | L  | 20        | L  |
| TM5     | 225                   | 5x64                   | E            | A         | 9                                    | 0                            | 2         | 1                                                        | -27   | Hb    | any                                          | D, E, H, K, ... | 62     | HY                                               | any       | 67       | Hb                                     | any       | 22                                         | A      | 16                         | K  | 17        | T  |
| TM7     | 320                   | 7x47                   | G            | A         | 0                                    | 0                            | 1         | 1                                                        | 25    | HA    | any                                          | A, I, L, M, V   | 78     | HY                                               | any       | 80       | HY                                     | any       | 22                                         | C      | 47                         | C  | 39        | C  |
| H8      | 337                   | 8x55                   | Q            | K         | 0                                    | 0                            | 0         | 0                                                        | 25    | Hd    | 5-6                                          | K, R, Y         | 73     | Hb                                               | any       | 59       | Hb                                     | any       | 24                                         | K      | 20                         | R  | 22        | R  |
| TM6     | 294                   | 6x56                   | I            | V         | 0                                    | 0                            | 2         | 1                                                        | -23   | HA    | 3-4                                          | I, L, M         | 91     | HY                                               | any       | 89       | HY                                     | any       | 20                                         | I      | 39                         | L  | 36        | L  |
| TM4     | 159                   | 4x51                   | I            | A         | 0                                    | 0                            | 1         | 1                                                        | 22    | Sm    | 1-2                                          | A, C, S         | 91     | HY                                               | any       | 84       | HY                                     | any       | 31                                         | A      | 32                         | V  | 23        | V  |
| TM5     | 220                   | 5x59                   | S            | V         | 0                                    | 0                            | 0         | 0                                                        | -22   | Sm    | any                                          | A, C, G, S      | 69     | HY                                               | any       | 60       | HY                                     | any       | 24                                         | V      | 16                         | G  | 15        | L  |
| TM4     | 147                   | 4x39                   | K            | P         | 3                                    | 0                            | 0         | 0                                                        | 21    | αH    | Min                                          | G, P            | 53     | HY                                               | any       | 50       | HY                                     | any       | 31                                         | P      | 21                         | R  | 19        | P  |
| TM5     | 224                   | 5x63                   | Q            | L         | 0                                    | 0                            | 0         | 0                                                        | 21    | L     |                                              | A, C, G, S      | 69     | αH                                               | Hig       | 51       | Hb                                     | any       | 31                                         | L      | 26                         | R  | 26        | R  |
| TM7     | 317                   | 7x43                   | V            | A         | 0                                    | 0                            | 0         | 0                                                        | 21    | Sm    | any                                          | A, C, G, S      | 82     | HY                                               | any       | 86       | HY                                     | any       | 24                                         | A      | 29                         | L  | 25        | L  |
| H8      | 338                   | 8x56                   | E            | L         | 0                                    | 0                            | 0         | 0                                                        | 21    | HA    | any                                          | A, I, L, M, V   | 69     | Hb                                               | any       | 86       | Hb                                     | any       | 13                                         | E      | 23                         | R  | 16        | R  |
| TM6     | 264                   | 6x26                   | F            | H         | 4                                    | 0                            | 0         | 0                                                        | 20    | Ha    | 4                                            | E, H, Q         | 60     | Hb                                               | any       | 50       | Hb                                     | any       | 13                                         | -      | 25                         | -  | 27        | -  |
| H8      | 332                   | 8x50                   | F            | V         | 0                                    | 5                            | 1         | 1                                                        | -20   | HY    | 4-5                                          | F, M, Y         | 93     | HY                                               | any       | 95       | HY                                     | any       | 56                                         | F      | 69                         | F  | 64        | F  |
| TM1     | 61                    | 1x60                   | F            | N         | 0                                    | 0                            | 0         | 0                                                        | 19    | Hu    | 3-4                                          | H, N, Q         | 84     | Hb                                               | any       | 81       | Hb                                     | any       | 31                                         | N      | 15                         | N  | 14        | N  |
| TM3     | 110                   | 3x29                   | T            | A         | 0                                    | 18                           | 77        | 10                                                       | 19    | HA    | 1-2                                          | A, V            | 53     | HY                                               | any       | 47       | HY                                     | any       | 20                                         | A      | 17                         | L  | 13        | G  |
| ICL2    | 139                   | 34x51                  | F            | L         | 23                                   | 0                            | 2         | 1                                                        | 19    | L     |                                              | L               | 87     | HY                                               | any       | 78       | HY                                     | any       | 49                                         | L      | 30                         | L  | 31        | R  |
| ICL2    | 140                   | 34x52                  | K            | R         | 4                                    | 0                            | 0         | 0                                                        | 19    | R     | 6                                            | R               | 67     | Hb                                               | any       | 66       | Hb                                     | any       | 40                                         | R      | 21                         | R  | 21        | R  |
| TM6     | 266                   | 6x28                   | L            | K         | 2                                    | 0                            | 0         | 0                                                        | 19    | Hd    | 4-5                                          | H, K, Q         | 56     | Hb                                               | any       | 54       | Hb                                     | any       | 13                                         | K      | 26                         | R  | 17        | R  |

Showing 1 to 20 of 65 entries (filtered from 268 total entries)

Previous 1 2 3 4 Next

CSV Excel

### Mutations to decrease G<sub>s</sub> binding

1. Mutations to increase G<sub>s</sub> binding    2. Mutations to decrease G<sub>s</sub> binding    3. All residue positions

#### Mutation design:

To **weaken coupling**, mutate receptor positions lacking a conserved negative (-) property by introducing the highest conserved amino acid (AA) of the G<sub>s</sub> non-binding GPCRs having that property. For positive (+) properties, which contribute to binding, instead mutate receptor positions into the highest conserved AA of the G<sub>s</sub> non-binding GPCRs lacking that property.

| Segment | Residue               |                        |              | Mutant AA | Structure interactions (# receptors) | Mutation data ≥5-fold effect |           | G <sub>s</sub> binders vs non-binders sequence signature |       |       | Property conservation G <sub>s</sub> binders |                    |        | Property conservation G <sub>s</sub> non-binders |           |          | AA conservation G <sub>s</sub> binders |           | AA conservation G <sub>s</sub> non-binders |        | AA conservation GPCR class |    |           |    |
|---------|-----------------------|------------------------|--------------|-----------|--------------------------------------|------------------------------|-----------|----------------------------------------------------------|-------|-------|----------------------------------------------|--------------------|--------|--------------------------------------------------|-----------|----------|----------------------------------------|-----------|--------------------------------------------|--------|----------------------------|----|-----------|----|
|         | Target residue number | Generic residue number | Target WT AA |           |                                      | Decrease coupling            | G protein | Ligand                                                   | #Mut. | #Rec. | Score (%)                                    | Property           | Length | Matching AAs                                     | Cons. (%) | Property | Length                                 | Cons. (%) | Property                                   | Length | Cons. (%)                  | AA | Cons. (%) | AA |
| ICL2    | 141                   | 34x53                  | Y            | A         | 11                                   | 2                            | 1         | 1                                                        | -43   | HY    | 4-5                                          | F, M, Y            | 82     | HY                                               | any       | 62       | Hb                                     | any       | 62                                         | Y      | 28                         | Y  | 35        | Y  |
| TM2     | 74                    | 2x45                   | S            | N         | 0                                    | 0                            | 0         | 0                                                        | -37   | Hb    | 3                                            | H, N               | 91     | Hb                                               | any       | 98       | Hb                                     | any       | 56                                         | S      | 57                         | N  | 51        | N  |
| TM5     | 223                   | 5x82                   | F            | I         | 1                                    | 1                            | 0         | 0                                                        | -37   | HA    | any                                          | A, I, L, M, V      | 76     | HY                                               | any       | 87       | HY                                     | any       | 29                                         | F      | 20                         | I  | 14        | L  |
| TM5     | 226                   | 5x85                   | A            | L         | 22                                   | 0                            | 10        | 1                                                        | -36   | HA    | 2-3                                          | I, L, V            | 89     | HA                                               | any       | 93       | HY                                     | any       | 42                                         | A      | 54                         | L  | 46        | L  |
| TM1     | 57                    | 1x56                   | A            | V         | 0                                    | 0                            | 1         | 1                                                        | 35    | Sm    | 0-1                                          | A, G               | 84     | HA                                               | any       | 79       | HY                                     | any       | 51                                         | A      | 37                         | V  | 31        | V  |
| TM1     | 86                    | 1x35                   | M            | L         | 0                                    | 5                            | 4         | 3                                                        | -34   | HA    | 2-3                                          | I, L, V            | 67     | HY                                               | any       | 83       | HY                                     | any       | 16                                         | L      | 25                         | L  | 27        | L  |
| TM5     | 215                   | 5x54                   | M            | I         | 0                                    | 0                            | 0         | 0                                                        | -34   | HA    | 2-3                                          | I, L, V            | 84     | HA                                               | any       | 87       | HA                                     | any       | 51                                         | M      | 39                         | I  | 34        | I  |
| ICL2    | 145                   | 34x57                  | L            | R         | 6                                    | 0                            | 0         | 0                                                        | 33    | HA    | any                                          | A, I, L, M, V      | 51     | αH                                               | Hig       | 61       | Hb                                     | any       | 27                                         | R      | 40                         | R  | 31        | R  |
| TM2     | 73                    | 2x44                   | T            | L         | 0                                    | 0                            | 1         | 1                                                        | -33   | αH    | Hig                                          | A, K, L, M, R      | 80     | HY                                               | any       | 81       | HY                                     | any       | 38                                         | V      | 36                         | L  | 33        | L  |
| TM4     | 154                   | 4x46                   | I            | C         | 0                                    | 0                            | 0         | 0                                                        | 32    | HA    | 2-3                                          | I, L, V            | 91     | HY                                               | any       | 78       | HY                                     | any       | 53                                         | I      | 33                         | I  | 30        | I  |
| TM3     | 107                   | 3x26                   | E            | K         | 0                                    | 1                            | 19        | 4                                                        | -32   | +     | any                                          | H, K, R            | 80     | Hb                                               | any       | 85       | Hb                                     | any       | 22                                         | K      | 34                         | K  | 34        | K  |
| TM3     | 118                   | 3x37                   | T            | Y         | 0                                    | 15                           | 69        | 11                                                       | -32   | HR    | 4-5                                          | F, H, Y            | 64     | Hb                                               | any       | 67       | Hb                                     | any       | 27                                         | T      | 30                         | Y  | 26        | Y  |
| TM4     | 172                   | 4x64                   | H            | F         | 0                                    | 2                            | 5         | 2                                                        | -32   | HY    | any                                          | A, C, F, I, L, ... | 42     | -                                                |           | 56       | HY                                     | any       | 42                                         | -      | 26                         | -  | 31        | -  |
| TM6     | 279                   | 6x41                   | M            | V         | 0                                    | 0                            | 2         | 1                                                        | -32   | HA    | 1-2                                          | A, V               | 87     | HY                                               | any       | 96       | HY                                     | any       | 24                                         | L      | 49                         | V  | 41        | V  |
| TM3     | 109                   | 3x28                   | W            | V         | 0                                    | 12                           | 57        | 12                                                       | 31    | HR    | any                                          | F, H, W, Y         | 76     | HY                                               | any       | 73       | HY                                     | any       | 22                                         | F      | 27                         | V  | 19        | V  |
| TM1     | 47                    | 1x46                   | I            | G         | 0                                    | 1                            | 3         | 1                                                        | -31   | G     | 0                                            | G                  | 62     | Sm                                               | any       | 76       | Sm                                     | any       | 29                                         | G      | 60                         | G  | 54        | G  |
| TM5     | 229                   | 5x68                   | Q            | R         | 22                                   | 0                            | 0         | 0                                                        | 29    | Hd    | 4                                            | H, Q               | 76     | Hb                                               | any       | 54       | Hb                                     | any       | 24                                         | Q      | 22                         | R  | 17        | R  |
| TM6     | 268                   | 6x30                   | E            | K         | 2                                    | 0                            | 8         | 4                                                        | 29    | E     | 4                                            | E                  | 91     | Hb                                               | any       | 80       | Hb                                     | any       | 51                                         | E      | 22                         | E  | 25        | E  |
| TM2     | 71                    | 2x42                   | F            | Y         | 0                                    | 1                            | 0         | 0                                                        | 28    | F     |                                              | F                  | 100    | HY                                               | any       | 98       | HY                                     | any       | 67                                         | F      | 39                         | F  | 38        | F  |
| TM5     | 216                   | 5x57                   | V            | C         | 0                                    | 1                            | 0         | 0                                                        | -28   | C     | 2                                            | C                  | 87     | HY                                               | any       | 86       | HY                                     | any       | 20                                         | A      | 44                         | C  | 38        | C  |

Showing 1 to 20 of 131 entries (filtered from 268 total entries)

Previous 1 2 3 4 5 6 7 Next

CSV Excel

1

2 **Supplementary Figure 3.** Coupling determinant mutation design. The Coupling determinant mutation design tool  
 3 ([https://gproteindb.org/mutations/gprot\\_coupling](https://gproteindb.org/mutations/gprot_coupling)) suggests mutations in a receptor to increase (top) or decrease  
 4 the coupling to a given G protein family (here the β<sub>2</sub>-adrenoceptor and G<sub>s</sub> family). The determinants suggested for  
 5 mutagenesis are predicted by tailoring the functionality of a sequence signature tool which identifies distinctly conserved  
 6 residues within one of two sets of receptors (1) (here G<sub>s</sub>- and non-G<sub>s</sub>-coupling class A GPCRs).

7

1 **Supplementary Table 1.** Distance and angle rules for defining GPCR – G protein interactions. The values are adapted  
 2 and extended from (2).

| Interaction                  | Moiety 1            | Moiety 2            | Max distance (Å)   | Angle rule                                                                                                                                                             |
|------------------------------|---------------------|---------------------|--------------------|------------------------------------------------------------------------------------------------------------------------------------------------------------------------|
| Hydrogen bond<br>(strong)    | Donor               | Acceptor            | 3.5                | $\langle \overrightarrow{\text{Donor} - \text{Hydrogen}}, \overrightarrow{\text{Hydrogen} - \text{Acceptor}} \rangle \in \left[ \frac{-\pi}{3}, \frac{\pi}{3} \right]$ |
| Hydrogen bond<br>(weak)      | Donor               | Acceptor            | 4.0                |                                                                                                                                                                        |
| Ionic                        | Cation              | Anion               | 4.0                |                                                                                                                                                                        |
| Hydrophobe                   | Hydrophobic<br>atom | Hydrophobic<br>atom | 4.5                |                                                                                                                                                                        |
| Aromatic<br>(Face to face)   | Ring center         | Ring center         | 4.4                | $\langle \overrightarrow{\text{ring normal}_1}, \overrightarrow{\text{ring normal}_2} \rangle \in \left[ \frac{-\pi}{6}, \frac{\pi}{6} \right]$                        |
| Aromatic<br>(Edge to face)   | Ring center         | Ring center         | 5.5                | $\langle \overrightarrow{\text{ring normal}_1}, \overrightarrow{\text{ring normal}_2} \rangle \in \left[ \frac{\pi}{6}, \frac{5\pi}{6} \right]$                        |
| Aromatic<br>( $\pi$ -cation) | Ring center         | Cation              | 6.6                | $\langle \overrightarrow{\text{ring normal}}, \overrightarrow{\text{ring center}^+} \rangle \in \left[ \frac{-\pi}{6}, \frac{\pi}{6} \right]$                          |
| Van-der-Waals<br>(vdW)       | vdW Atom            | vdW Atom            | 1.1*atom radii sum |                                                                                                                                                                        |

3

## 1 REFERENCES

- 2 1. Kooistra, A.J., Mordalski, S., Pándy-Szekeres, G., Esguerra, M., Mamyrbekov, A., Munk, C., Keserű, G.M. and  
3 Gloriam, David E. (2021) GPCRdb in 2021: integrating GPCR sequence, structure and function. *Nucleic Acids*  
4 *Res.*, **49**, D335-D343.
- 5 2. Marcou, G. and Rognan, D. (2007) Optimizing fragment and scaffold docking by use of molecular interaction  
6 fingerprints. *J. Chem. Inf. Model.*, **47**, 195-207.

7
